# Supplementary material for: Ectopic Expression of a Novel Cold-resistance Protein 1 (BoCRP1) from Brassica Oleracea Promotes Tolerance to Cold via Modulating Stress Associated Components
Source: Research Square preprint supplement (doi:10.21203/rs.3.rs-168627/v1), 2021-02-04
Supplement: Supplementary file 1 [file 522669286036b1dbcb6910d8.docx]

**Supplementary Information**

**Ectopic expression of a novel cold-resistance protein 1 (*BoCRP1*) from *Brassica oleracea*, promotes tolerance to cold via modulating stress associated components**

Umer Majeed1,2 Sheikh Tahir Majeed2, Vaseem Raja1, Zubair Ahmad Wani2, Nelofer Jan1, Khursid Iqbal Andrabi1, Riffat John1*

1 Plant Molecular Biology Department of Biotechnology University of Kashmir

2 Department of Biotechnology University of Kashmir

***Communicating author**

Dr. Riffat John

Sr. Assistant professor

Department of Botany

University of Kashmir, Srinagar, 190 006

Kashmir, India.

E-mail: [riffatminhaj@kashmiruniversity.ac.in](mailto:riffatminhaj@kashmiruniversity.ac.in)

Riffat_iit@yahoo.com

**
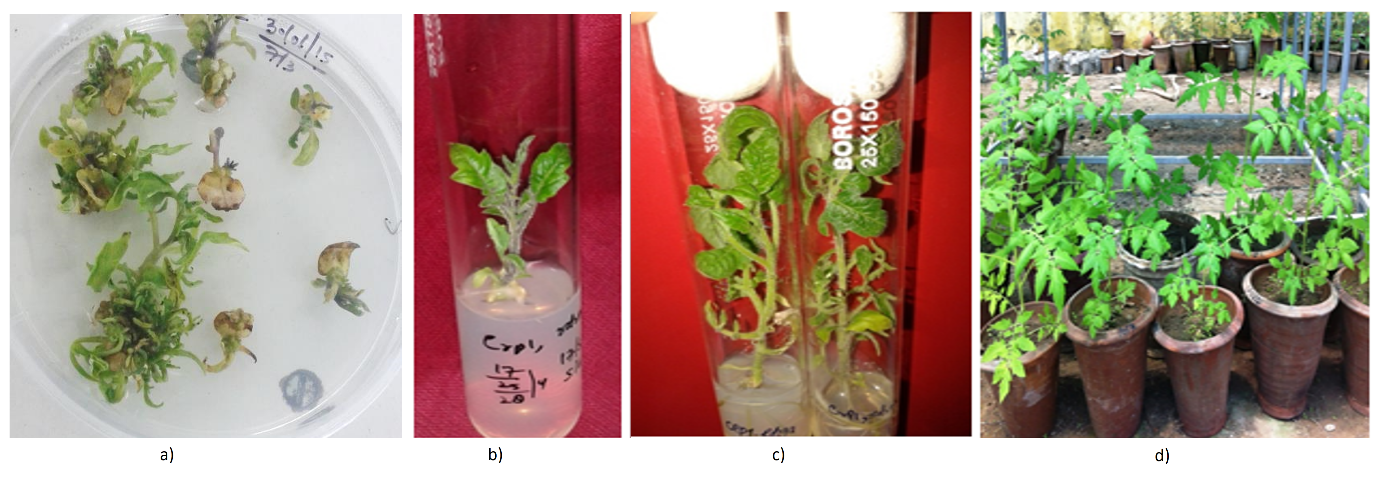
**

**Figure S1. Generation of transgenic lines via agrobacterium mediated transformation of tomato plants** . **(a)** Depicts the transgenic shoot lets generated transformed cotyledons on selection media containing kanamycin as selection marker along with Zeatin and IAA **(b)&(c)** transgenic shoots generated from each cotyledon were individually shifted on shoot elongation medium containing 50 mg L-1 kanamycin , 2 mg L-1 zeatin, 0.1 mg L-1 IAA and then shifted to root elongation medium containing 50 mg L-1 kanamycin , 0.5 mg L-1 zeatin, 1 mg L-1 IAA to generated full-fledged transgenic plants with developed root system. **(d)** The transgenic plants were moved from test tubes to pots containing mixture of soil and vermiculite . In order to adopt to the external environment and maintain under high humidity these pots were kept under polythene for few days before exposed to green house conditions.
